# Supplementary material for: Paired and solitary ionocytes in the zebrafish olfactory epithelium
Source: PubMed Central journal article supplement — bioRxiv. 2025 Jul 7:2024.11.08.620918. Originally published 2024 Nov 8. Preprint. [Version 3] doi: 10.1101/2024.11.08.620918 (PMC11580993; doi:10.1101/2024.11.08.620918), 2025-07-07
Supplement: NIHPP2024.11.08.620918v1-supplement-12.pdf [file NIHPP2024.11.08.620918v1-supplement-12.pdf]

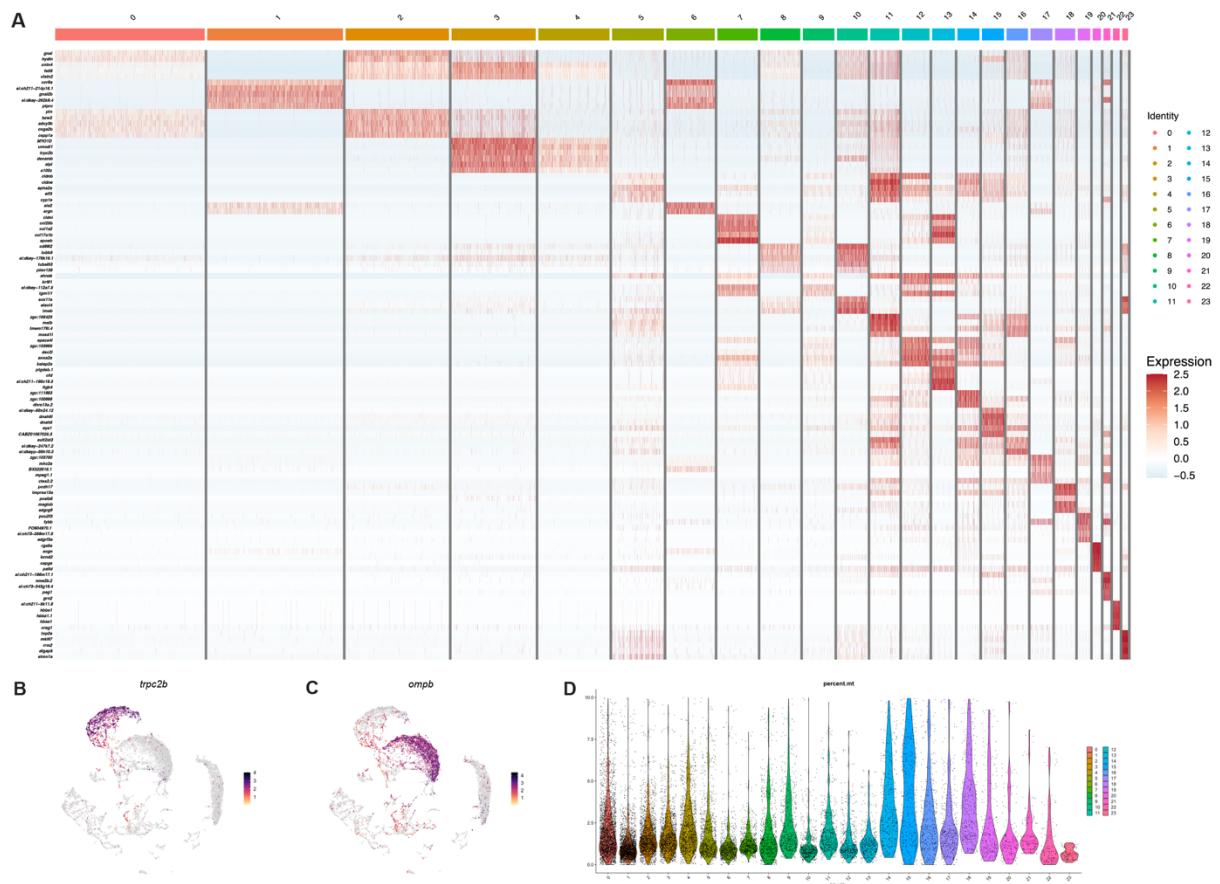

733

734 **Figure S1, related to Figure 1**

735 **(A)** Heatmap showing top 5 highest expressing genes based on LogFC on the  
736 clusters obtained in the dataset from dissected adult zebrafish olfactory organs. **(B)**  
737 Feature plots of *trpc2b* and **(C)** *ompb*. **(D)** Violin plot showing the percentage of  
738 mitochondrial genes in the dataset.

739

740

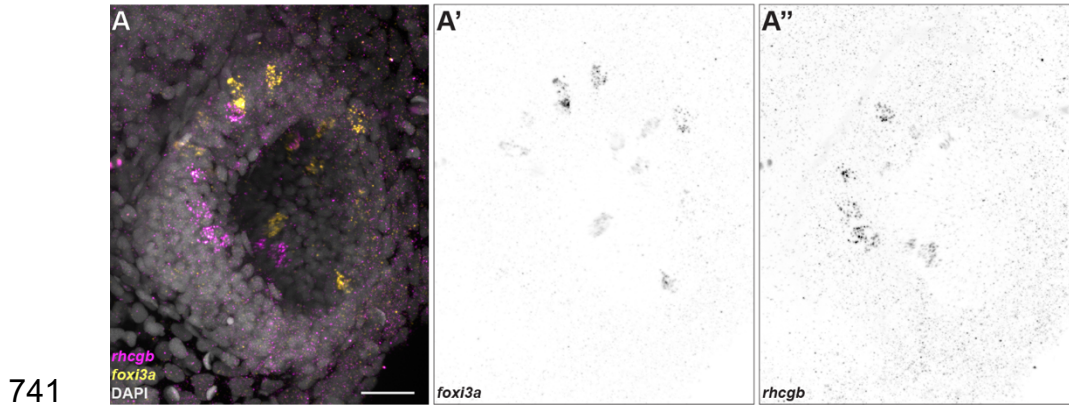

742 **Figure S2, related to Figure 2**

743 (A) Maximum intensity projection of a confocal image showing HCR RNA-FISH  
744 signals for *foxi3a* (yellow) and *rhcgb* (magenta) with DAPI stain (grey). (A') Individual  
745 channels for *foxi3a* and (A'') *rhcgb*. Scale bar: 20 μm.

746

747

748

749

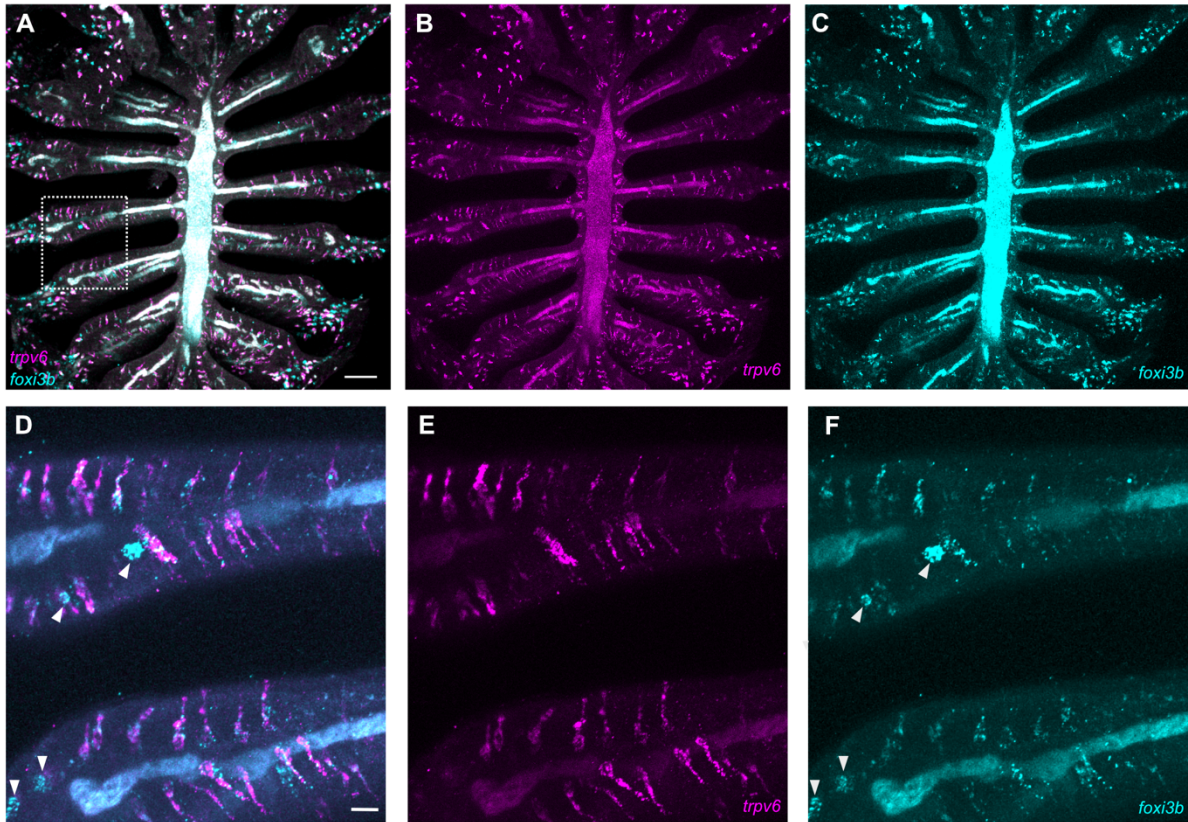

750

751 **Figure S3, related to Figure 3**

752 **(A-C)** Overview of an adult olfactory rosette, showing expression of *trpv6* **(B)** and  
753 *foxi3b* **(C)**. **(D-F)** High magnification view of the region outlined in panel A. The  
754 arrowheads indicate solitary NCC-like ionocytes, which express *foxi3b* and have a  
755 rounded shape. These are distinct from elongated pairs of cells that express either  
756 *foxi3b* or *trpv6*. Scale bar: 50  $\mu$ m in panel A, 20  $\mu$ m in panel D.



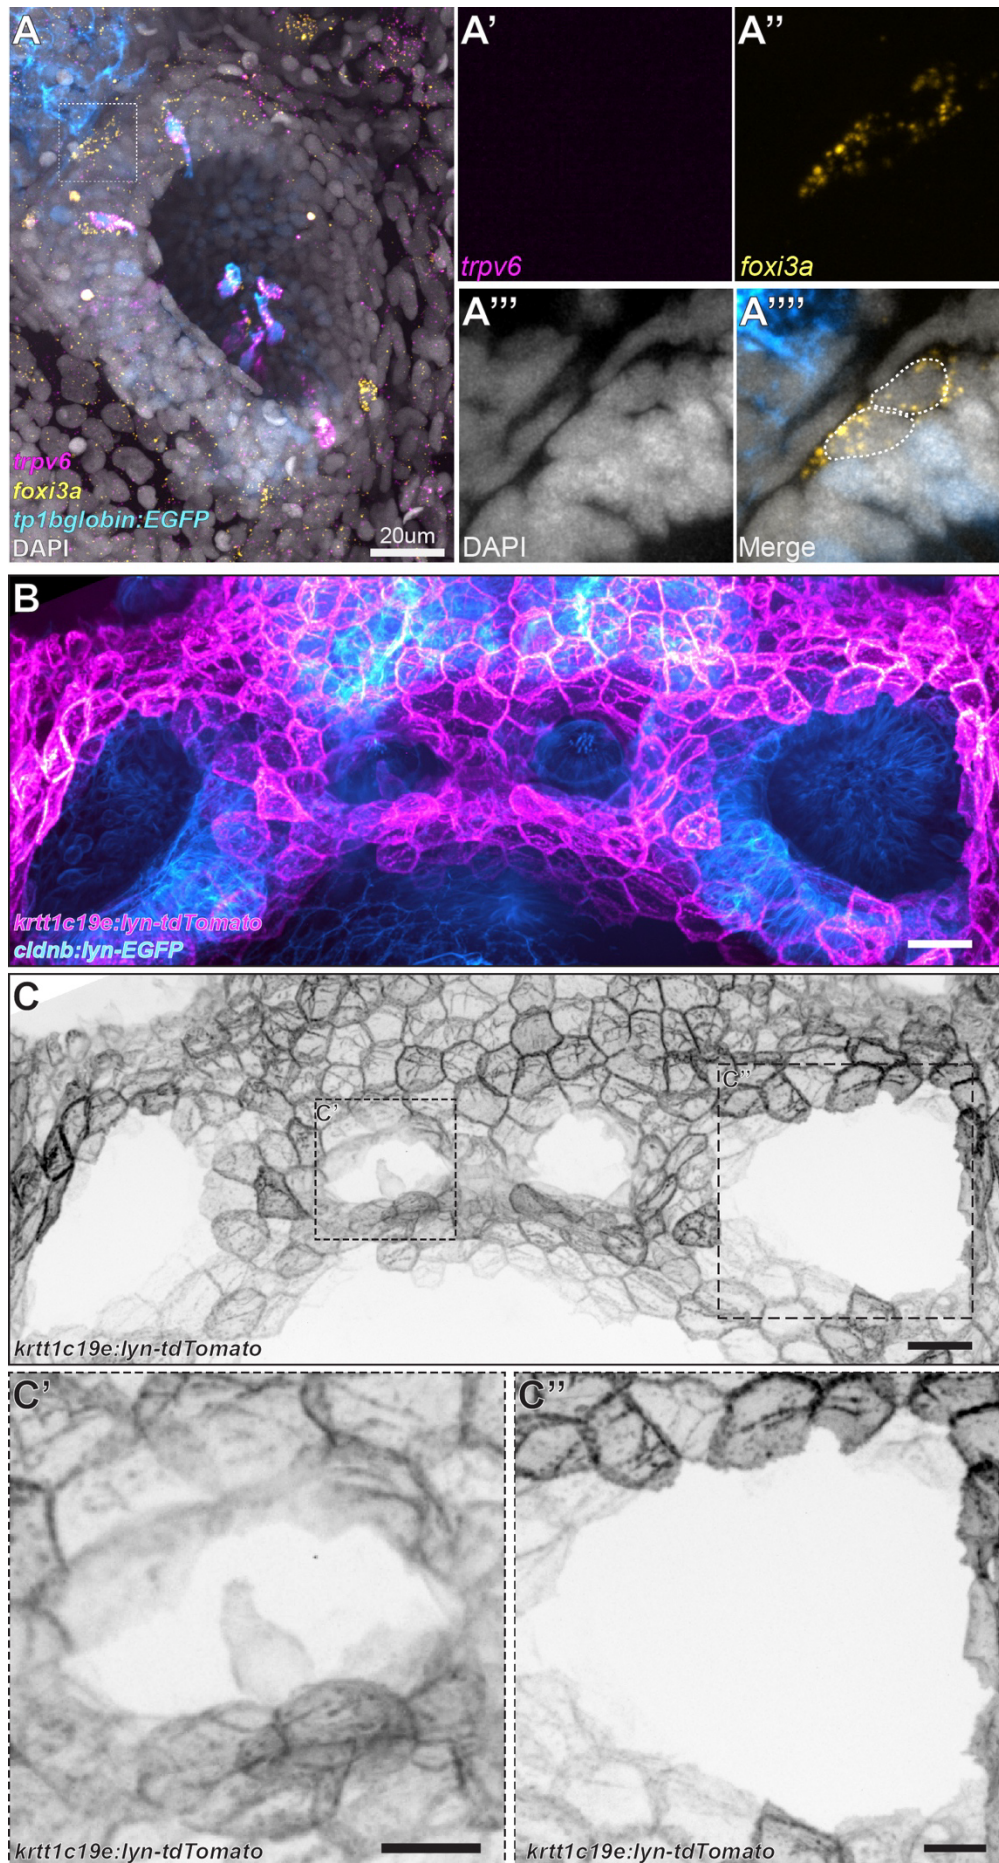

757

758 **Figure S4, related to Figure 4**

759 **(A–A''')** *foxi3a*<sup>+</sup> cells (yellow) at the edge of an olfactory pit, as shown by HCR  
760 RNA-FISH. **(B)** Maximum intensity projection of a confocal image from *Tg(-*  
761 *8.0cldnb:lyn-EGFP)<sup>zf106Tg</sup>;Tg(krtt1c19e:lyn-tdTomato)<sup>sq16</sup>* transgenic larva shows a  
762 pair of Nm ionocytes in the neuromast, but no tdTomato<sup>+</sup> cells in the olfactory pit. **(C)**  
763 Single channel image of *krtt1c19e:lyn-tdTomato*. **(C')** Enlargement of a neuromast  
764 containing tdTomato<sup>+</sup> Nm ionocytes. **(C'')** Enlargement of an olfactory pit containing  
765 no tdTomato<sup>+</sup> cells.

## 766 **Supplementary Material**

### 767 **Supplementary Table 1. Differentially expressed genes in dissected adult**

768 **zebrafish olfactory organ scRNA-seq dataset.** This spreadsheet contains the  
769 differentially expressed gene list (cluster markers) of olfactory cell types from the  
770 integrated adult dataset via Seurat::FindAllMarkers function with default parameters.  
771 Ionocytes are on cluster 18.

### 772 **Supplementary Table 2. Differentially expressed genes in larval 5 dpf olfactory**

773 **cell subset.** This spreadsheet contains the differentially expressed gene list (cluster  
774 markers) of olfactory cell types from the subsetted larval dataset via  
775 Seurat::FindAllMarkers function with default parameters.

### 776 **Movie 1. 3D rendering of an embryonic olfactory pit depicting HR- and NaR-like**

777 **ionocytes.** HCR RNA-FISH for *trpv6* (magenta) and *foxi3a* (yellow), combined with  
778 the Notch reporter *tp1bglobin:EGFP* (cyan), shows spatial distribution of ionocyte  
779 pairs in the larval 5 dpf olfactory pit. Initial image is a frontal view of the left olfactory  
780 pit, with dorsal to the top and lateral to the right.

### 781 **Movie 2. 3D rendering of an embryonic olfactory pit showing NCC-like**

782 **ionocytes.** HCR RNA-FISH for *slc12a10.2* (yellow) and *foxi3b* (magenta), combined  
783 with the Notch reporter *tp1bglobin:EGFP* (cyan), showing the spatial distribution of  
784 ionocyte pairs in the larval 5 dpf olfactory pit. Initial image is a frontal view of the left  
785 olfactory pit, with dorsal to the top and lateral to the right.

### 786 **Movie 3. New olfactory ionocytes do not express skin transgenes.** Time lapse

787 from *Tg(-8.0cldnb:lyn-EGFP)<sup>zf106Tg</sup>;Tg(krtt1c19e:lyn-tdTomato)<sup>sq16</sup>* transgenic

788 zebrafish larva showing pairs of tdTomato<sup>+</sup> Nm ionocytes (arrow, middle panel)

789 invading neuromasts, but no positive cells in the olfactory epithelium.

790 **Movie 4. Differentiation of ionocyte pairs in a larval olfactory pit and**

791 **neuromast.** Time lapse from a 3 dpf transgenic zebrafish larva (*Tg(dld:hist2h2l-*

792 *EGFP)<sup>psi84</sup>*) showing a pair of ionocytes (cyan and yellow dots; visible at the start of

793 the recording) invading the neuromast. At ~90 hours ionocytes are visible in the

794 olfactory pit (red and cyan dots). No invasion was detected.

795 **Movie 5. Ionocyte pair development in a larval olfactory pit.** Time lapse from a 3

796 dpf transgenic zebrafish larva (*Tg(dld:hist2h2l-EGFP)<sup>psi84</sup>*) showing the appearance

797 of a pair of olfactory ionocytes (red and cyan dots). The pair is visible at

798 approximately 85 hours, and move around together.

799 **Movie 6. 3D reconstruction of an HR-like/NaR-like ionocyte pair from a 7 dpf**

800 **wild-type olfactory pit.** 360° rotation of Fig. 6A. Red, HR-like cell; cyan, NaR-like

801 cell.

802 **Movie 7. 3D reconstruction of the tight junctions of an HR-like/NaR-like**

803 **ionocyte pair.** 360° rotation of Fig. 6G; compare to Movie 9. Green, shallow tight

804 junction between the two ionocytes; yellow, deep tight junction between NaR-like

805 ionocyte and olfactory supporting cell; orange, deep tight junction between NaR-like

806 ionocyte and multiciliated cell; blue, deep tight junction between HR-like ionocyte

807 and olfactory supporting cell.

808 **Movie 8. 3D reconstruction of a 3-cell ionocyte complex from a 7 dpf wild-type**

809 **olfactory pit.** 360° rotation of Fig. 6L. Red, HR-like cell; cyan, NaR-like cell; dark

810 blue, possible second NaR-like cell; yellow, ciliated OSN (not part of the ionocyte  
811 complex, but included for context and scale).

812 **Movie 9. 3D reconstruction of the tight junctions between the HR-like (red) and**  
813 **NaR-like (cyan) ionocytes in Fig. 6L.** 360° rotation of Fig. 6P; compare to Movie 7.  
814 Green, shallow tight junction between the two ionocytes; yellow, deep tight junction  
815 between NaR-like ionocyte (cyan) and olfactory supporting cell; blue, deep tight  
816 junction between HR-like ionocyte (red) and olfactory supporting cell.
